# Supplementary material
Source: PubMed Central journal article supplement (PMC7103314)
Supplement: mmc1.pdf [file mmc1.pdf]

*SUPPLEMENTARY MATERIALS***Demineralized bone matrix in bone repair: history and use**

Elliott Gruskin<sup>1\*</sup>, Bruce A. Doll<sup>2</sup>, F. William Futrell<sup>3</sup>, John P. Schmitz<sup>4</sup>,  
Jeffrey O. Hollinger<sup>5</sup>

**SUPPLEMENTARY TABLE 1****Table 1: Donor social and behavioral risk factors in DBM procurement**

- Men who have had sex with another man in the preceding five years.
- Persons who have injected drugs for a non-medical reason in the preceding five years.
- Persons with hemophilia or related clotting disorders who have received human-derived clotting factor concentrates.
- Persons who have engaged in sex in exchange for money or drugs in the preceding five years.
- Persons who have had sex in the preceding 12 months with any person described in the previous 4 items of this section.
- Persons who have been exposed in the preceding 12 months to known or suspected HIV, HBV, and/or HCV-infected blood through percutaneous inoculation (e.g., needle stick) or through contact with an open wound, non-intact skin, or mucous membrane.
- Children born to mothers with or at risk for HIV infection.
- Current inmates of correctional systems (including jails and prisons) and individuals who have been incarcerated for more than 72 consecutive hours during the previous 12 months.
- Persons who have had close contact within 12 months preceding donation with another person having clinically active viral hepatics.
- Persons who within 12 months of donation have undergone tattooing, ear piercing, or body piercing in which shared instruments are known to have been used.
- Persons who have had a past diagnosis of clinical, symptomatic viral hepatitis after age 11.
- Persons who have known or suspected sepsis at the time of death.

- Persons who have had recent smallpox vaccination.
- Persons who acquired a clinically recognizable vaccinia virus infection by close contact with someone who received the smallpox vaccine.
- Persons who have had a medical diagnosis of West Nile Virus (WNV) infection.
- Persons who have had both a fever and a headache (simultaneously) during the 7 days before donation.
- Persons who are suspected to have Severe Acute Respiratory Syndrome (SARS) or treatment for SARS within the previous 28 days.
- Persons who have had close contact within the previous 14 days with persons with SARS or suspected SARS.
- Persons who have traveled to or resided in areas affected by SARS within the previous 14 days.
- Persons who are xenotransplantation product recipients or intimate contacts of a xenotransplantation product recipient.

**Supplementary Table 2**

**Table 2: Exclusionary Donor Risk Factors in DBM procurement**

| Physical Evidence                                                                                                                                                                                                                                                                                                                                                                                                                                                                     | Clinical Evidence                                                                                                                                                                                                                                                                        |
|---------------------------------------------------------------------------------------------------------------------------------------------------------------------------------------------------------------------------------------------------------------------------------------------------------------------------------------------------------------------------------------------------------------------------------------------------------------------------------------|------------------------------------------------------------------------------------------------------------------------------------------------------------------------------------------------------------------------------------------------------------------------------------------|
| <ul style="list-style-type: none"> <li>• Physical evidence for risk of sexually transmitted diseases such as genital ulcerative disease, herpes simplex, syphilis, chancroid;</li> <li>• For a male donor, physical evidence of anal intercourse including perianal condyloma;</li> <li>• Physical evidence of nonmedical percutaneous drug use.</li> <li>• Physical evidence of recent tattooing, ear piercing, or body piercing;</li> <li>• Disseminate lymphadenopathy;</li> </ul> | <ul style="list-style-type: none"> <li>• HIV infection</li> <li>• Hepatitis infection</li> <li>• Syphilis infection</li> <li>• Vaccinia infection</li> <li>• West Nile Virus infection</li> <li>• SARS infection</li> <li>• Sepsis</li> <li>• Human T-cell Lymphotropic Virus</li> </ul> |

|                                                                                                                                                                                                                                                                                                                                                                                                                                                                                                                                                                                                            |  |
|------------------------------------------------------------------------------------------------------------------------------------------------------------------------------------------------------------------------------------------------------------------------------------------------------------------------------------------------------------------------------------------------------------------------------------------------------------------------------------------------------------------------------------------------------------------------------------------------------------|--|
| <ul style="list-style-type: none"><li>• Oral thrush</li><li>• Blue or purple spots consistent with Kaposi's sarcoma;</li><li>• Unexplained jaundice, hepatomegaly, or icterus.</li><li>• Physical evidence of sepsis.</li><li>• Large scab consistent with recent smallpox immunization;</li><li>• Eczema vaccinatum;</li><li>• Generalized vesicular rash</li><li>• Severely necrotic lesion consistent with vaccinia necrosum;</li><li>• Corneal scarring consistent with vaccinia keratitis.</li><li>• Active infection, TB; autoimmune diseases</li><li>• Metabolic bone disease; malignancy</li></ul> |  |
|------------------------------------------------------------------------------------------------------------------------------------------------------------------------------------------------------------------------------------------------------------------------------------------------------------------------------------------------------------------------------------------------------------------------------------------------------------------------------------------------------------------------------------------------------------------------------------------------------------|--|
